# Supplementary material
Source: publisher figshare collection journal article supplement (https://diabetesjournals.figshare.com/ndownloader/files/29149665)
Supplement: Supplementary file 1 [file 29149665]

## **Online Supplemental Material**

## **The Pediatric Diabetes Consortium Study Group:**

**Clinical Centers:** (Listed clinical center name, city, and state. Personnel are listed as (PI) for Principal Investigator, (I) for co-Investigator and (C) for Coordinators). **(1) Baylor College of Medicine**, Houston, TX: Fida Bacha, MD (PI); Morey Haymond, MD (I); Elizabeth Johnson (C); David Gomez (C); Alix Halter (C); Andrene McDonald (C); **(2) Children's Hospital of Los Angeles**, Los Angeles, CA: Lynda Fisher, MD (PI); Jamie Wood, MD (I; relocated to University Hospital Cleveland Medical Center, Cleveland, OH); Brian Ichihara (C); Megan Lipton, MA; **(3) Stanford University**, Stanford, CA: Sejal Shah, MD (PI); Avni Shah, MD (I); Bruce Buckingham, MD (I); Liana Hsu (C); **(4) Department of Endocrinology, Children's Hospital Colorado**, Aurora, CO: Philip Zeitler, MD (PI); Megan Kelsey (I); Wesley Pendleton (C); Barbara Davis Center for Childhood Diabetes, University of Colorado School of Medicine, Aurora, CO: Georgeanna J. Klingensmith, MD (PI); Heidi Haro (C); Katherine Manseau (C); **(5) University of Florida**, Gainesville, FL: Janet Silverstein, MD (PI); Desmond Schatz, MD (I); Michael J. Haller, MD (I); Teresa Lyles, PhD (C), Jamie Thomas (C); **(6) Yale University**, New Haven, CT: William V. Tamborlane, MD (PI); Michelle Van Name, MD (I); Eda Cengiz, MD (I); Amy Steffen, (C); Elvira Duran (C); Jennifer Finnegan (C); **(8) Perelman School of Medicine at the University of Pennsylvania, Children's Hospital of Philadelphia**, Philadelphia, PA: Steven M. Willi, MD (PI); **Children's Hospital of Philadelphia**, Philadelphia, PA: Colin Hawkes, MD (I); Olena Kucheruk (C); Elizabeth Caruso (C); Sooji Lee **(9) Children's Mercy Kansas City**, Kansas City, MO: Mark Clements, MD (PI); Jennifer Bedard (C); Julie De La Garza (C); Yara Duran (C); Jennifer James (C); Darlene Brenson-Hughes (C); Elizabeth Ramey (C); **(10) Indiana University**, Indianapolis, IN: Tamara Hannon, MD (PI); Brett McKinney (C); Katie Haberlin; **(11) University of Oklahoma**, Oklahoma City,

OK: Minu M. George, MD (PI); Jeanie Tryggestad, MD (Sub-I); Joane Less (C); **(12)**

**University of California San Diego**, San Diego, CA: Michael Gottschalk, MD (PI); Marla

Hashiguchi (C); Dawn Rosenblum (C); Nathalie Marois (C); **(13) Montefiore Medical Center**,

Bronx, NY: Rubina Heptulla, MD (PI); Doreen Johnson Newell (C); Jeniece Trast (C); Ranjitha

Katikaneni (C); **(14) University of Texas Health Science Center at San Antonio**, San Antonio,

TX: Jane Lynch, MD (PI); Rose Ann Barajas (C); **(15) Greenville Health System**, University of

South Carolina School of Medicine-Greenville, Greenville, SC: Bryce Nelson, MD (PI); Carrie

Frost (C); Lisa Looper (C); **(16) University of Texas Southwestern Medical Center**, Dallas,

TX: Olga Gupta, MD (PI); Yasmin Dominguez (C); Rita Martin (C); Carla Logan (C); Jordan

Streetman (C); **(17) Vanderbilt University**, Nashville, TN: Ashley Shoemaker, MD (PI); Lauren

Williams (C); Faith Brendle (C); Jennifer Leshko (C); **(18) University of Mississippi Medical**

**Center**, Jackson, MS: Naznin Dixit, MD (PI); Heather Williams (C); Dana Lindsay (C); **(19)**

**University Hospital Cleveland Medical Center**, Cleveland, OH: Jamie Wood, MD (PI); Terri

Casey (C); Paul McGuigan (C); **Coordinating Center: Jaeb Center for Health Research**,

Tampa, FL: Roy W. Beck, MD, PhD; Lindsey C. Beaulieu, MA; Peiyao Cheng, PhD; Robin L.

Gal, MSPH; Craig Kollman, PhD; TJ Mouse; Katrina J. Ruedy, MSPH.

**Supplemental Figure 1: BMI Z score trajectory by racial-ethnic group.** The bottom and top of each box denote the 25th and 75th percentiles, the line inside the box denotes the median and the circle is the mean.

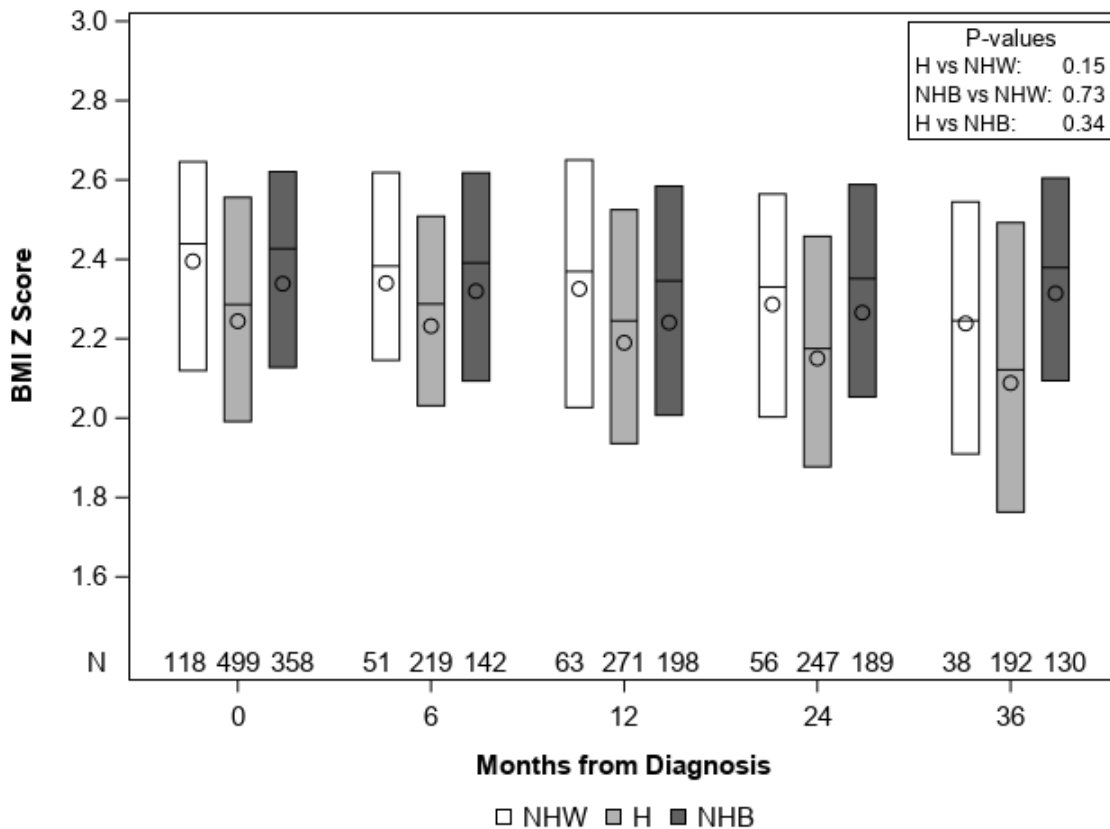

Footnote: N: refers to number of observations at each time point. Missing data were mainly related to different lengths of follow-up in the registry. There was no significant difference in participants' characteristics at diagnosis between participants with vs. without missing BMI data except for age and sex which were adjusted for in the model.
